# Supplementary material for: Epidermal growth factor receptor signalling in human breast cancer cells operates parallel to estrogen receptor α signalling and results in tamoxifen insensitive proliferation
Source: PubMed Central journal article supplement (PMC4021213; doi:10.1186/1471-2407-14-283), 2014-04-23
Supplement: 1471-2407-14-283-S1.pdf [file 1471-2407-14-283-S1.pdf]

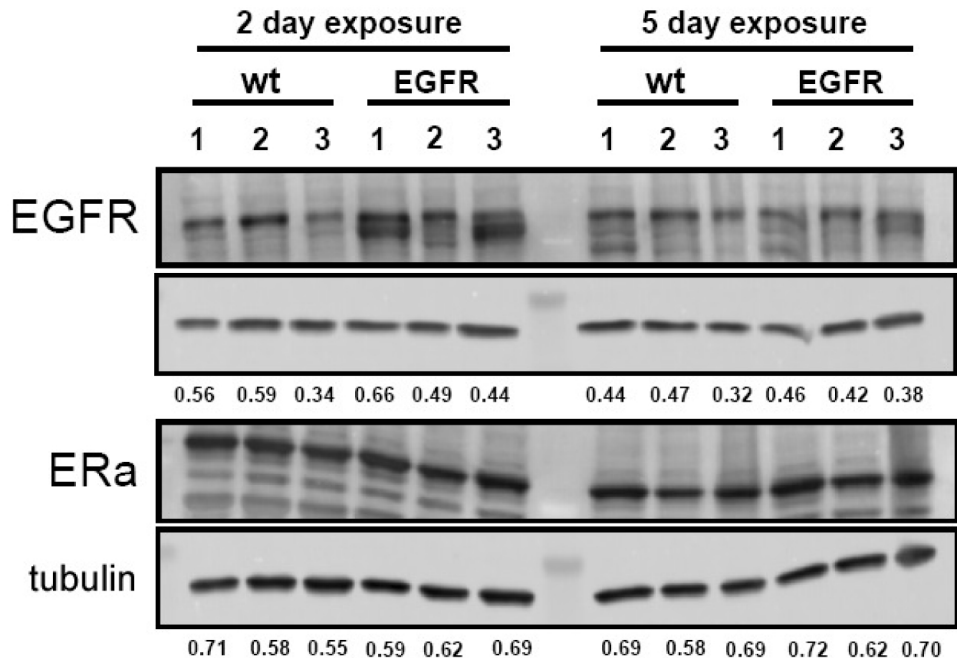

1. Starvation without EGF
2. Starvation with EGF
3. Basal medium
